# Supplementary material for: Single-atom transition metals doping two-dimensional BXN materials (X = 2, 3, 5) with promising electrocatalytic activity for efficient hydrogen production in the entire pH range
Source: Royal Society of Chemistry journal article supplement (doi:10.1039/d4ma00161c), 2024-01-01
Supplement: d4ma00161c1.pdf [file d4ma00161c1.pdf]

## Supplementary material

# Electronic properties modulation for two-dimensional materials of boron phosphorus monolayer and derived single atom catalysts for the hydrogen evolution reaction

Yuhua Wei<sup>4</sup> Feng Gao<sup>1,2,3\*</sup> Hong Liu<sup>1,2,3</sup> Wei Qi<sup>2,3</sup> Sichao Du<sup>2,3</sup> Hao Xie<sup>1,2,3</sup>

Duo Xiao<sup>1,2,3</sup>

<sup>1</sup>*School of Information and Electrical Engineering, Hangzhou City University, Hangzhou, Zhejiang 310015, China*

<sup>2</sup>*Academy of Edge Intelligence Hangzhou City University, Hangzhou City University, Hangzhou, Zhejiang 310015, China*

<sup>3</sup>*Zhejiang Engineering Research Center for Edge Intelligence Technology and Equipment, Hangzhou City University, Hangzhou, Zhejiang 310015, China*

<sup>4</sup>*Department of Physics, International Centre of Quantum and Molecular Structures, Shanghai University, Shanghai 200444, China*

### Computational details about HER.

To evaluate the stability of the supported single atom catalysts (SACs), the binding energy ( $E_b$ ) can be calculated by the following equation:

$$E_b(\text{TM}) = E_{\text{TM@sub}} - E_{\text{sub}} - E_{\text{TM}} \quad (\text{S1})$$

where  $E_{\text{TM@sub}}$ ,  $E_{\text{sub}}$  and  $E_{\text{TM}}$  represent the total energies of TM@2D B<sub>x</sub>N materials, 2D B<sub>x</sub>N materials substrate and TM single atom, respectively. Generally, a negative

---

\*Corresponding author.

E-mail address: [gaofengphys@163.com](mailto:gaofengphys@163.com) (Feng Gao).

$E_b$  means stable binding of TM atom on  $B_xN$  materials surface, and a more negative value indicates a stronger bonding strength.

To evaluate the HER activity of SACs, the Gibbs free energy change ( $\Delta G_{H^*}$ ) of H adsorption is obtained using the method of Nørskov [1], where the hydrogenation process could be expressed as equation (S2):

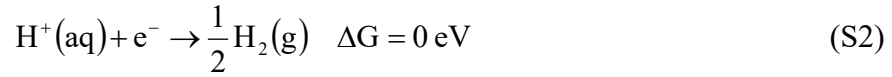

Therefore, according to the Sabatier principle, the  $\Delta G_{H^*}$  was a reliable descriptor to evaluate HER activity of catalysts [2]. It is well established that the ideal value for HER was  $\Delta G_{H^*}=0$ , that is, the absolute value of  $\Delta G_{H^*}$  closes to zero, meaning the SACs own excellent catalytic activity and it was given in equation (S3):

$$\Delta G_{H^*} = \Delta E_H + \Delta E_{ZPE} - T\Delta S_H + \Delta G(pH) \quad (S3)$$

$\Delta E_H$  is the differential hydrogen adsorption energy, which is obtained by:

$$\Delta E_H = E_{nH^*} - E_{(n-1)H^*} - \frac{1}{2} E_{H_2} \quad (S4)$$

$E_{nH^*}$  and  $E_{(n-1)H^*}$  describe the total energies of the 2D  $B_xN$  materials substrate with  $n$  and  $(n-1)$  adsorbed hydrogen atom, respectively, while  $E_{H_2}$  is the total energy of a  $H_2$  molecule in gas.  $\Delta E_{ZPE}$  and  $\Delta S_H$  are the correction of in zero-point energy and entropy change between the adsorbed H atom and  $1/2 H_2$  in gas phase, respectively. Therefore,  $\Delta E_{ZPE}$  is defined as:

$$\Delta E_{ZPE} = E_{ZPE}^{nH^*} - E_{ZPE}^{(n-1)H^*} - \frac{1}{2} E_{ZPE}^{H_2} \quad (S5)$$

where  $E_{ZPE}^{nH^*}$  and  $E_{ZPE}^{(n-1)H^*}$  are the zero-point energy of  $(n+1)$  and  $n$  adsorbed H atoms on the TM@2D  $B_xN$  materials, respectively. The  $E_{ZPE}^{H_2}$  is the zero-point energy of  $H_2$  molecule in the gas phase.  $\Delta S_H$  is defined as [3,4]:

$$\Delta S_H = \sum_{i=1}^{3N} \left[ -R \ln \left( 1 - e^{-\frac{h\nu_i}{T k_B}} \right) + \frac{N_A h \nu_i}{T} \frac{e^{-\frac{h\nu_i}{T k_B}}}{1 - e^{-\frac{h\nu_i}{T k_B}}} \right] - \frac{1}{2} S_{H_2} \quad (S6)$$

In general,  $\Delta S_H$  is calculated as  $\Delta S_H \approx -1/2 S_{H_2}$ , which is approximately 0.20 eV when the value of pH is zero under standard conditions [5]. In this study, all calculations consider the HER occurs in all pH value.

At present, there has been controversy on the pH dependence of the catalytic activity [6-8]. Nevertheless, a thermochemical approach established by Nørskov et al. have predicted results in conformity to the experimental trends [2]. Therefore, this theoretical method is widely used to assess the pH dependent free energy barrier for H-adsorption on catalytic surfaces. On the basis of this theory, the entropy of hydrogen ion in an electrochemical process mainly depends on the pH. The effect of pH to  $\Delta G_{H^*}$  is regarded as an additional entropic potential, then through the correction of entropy changes and vibration at 298.15 K, we can obtain the corrected Gibbs free energy change ( $\Delta G(\text{pH})$ ) [9], using equation (S7):

$$\Delta G(\text{pH}) = \kappa_B T \ln(10) \times \text{pH} \quad (S7)$$

where  $\Delta G(\text{pH})$  is closely in connection with the pH of the electrolyte and is an additional barrier for the H-adsorption. This simple expression as a function of pH values could be adopted to evaluate the catalytic performance of HER. Its essence is a thermodynamic estimate due to the change of the free energy of hydrogen ions in the electrolyte at different pH values. In equation (7), the value of  $k_B T \ln(10)$  approximately equals to  $5.92 \times 10^{-2}$  eV at  $T = 298.15$  K. At  $\text{pH}=14$ ,  $\Delta G(\text{pH})$  reaches a maximum value of 0.83 eV, which is in agreement with previous study (0.78 eV) [10].

Hence, the catalytic activity of SACs surface can be effectively improved by adjusting the pH of the electrolyte.

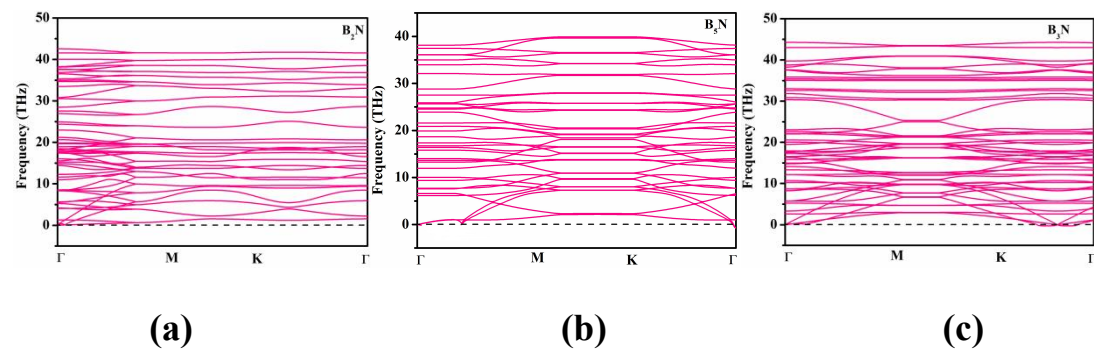

Fig. S1. Phonon band structure of the 2D (a)  $B_2N$  (b)  $B_3N$  and (c)  $B_5N$  monolayers.

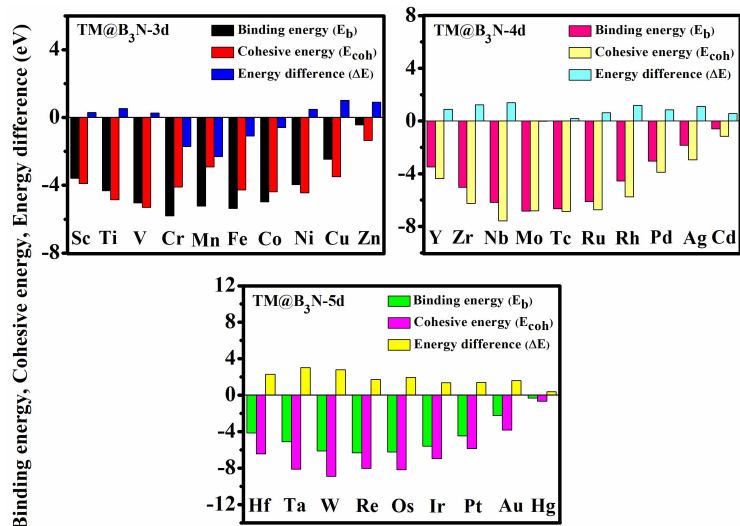

Fig. S2. The different TM atoms adsorption on the  $B_3N$  monolayer compounds and the corresponding binding energy ( $E_b$ ), cohesive energy ( $E_{coh}$ ) and their energy difference ( $\Delta E$ ).

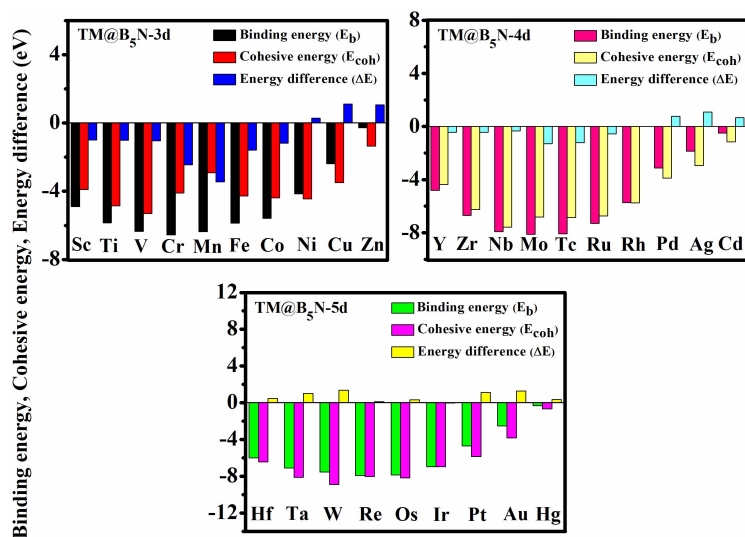

Fig. S3. The different TM atoms adsorption on the  $B_5N$  monolayer compounds and the corresponding binding energy ( $E_b$ ), cohesive energy ( $E_{coh}$ ) and their energy difference ( $\Delta E$ ).

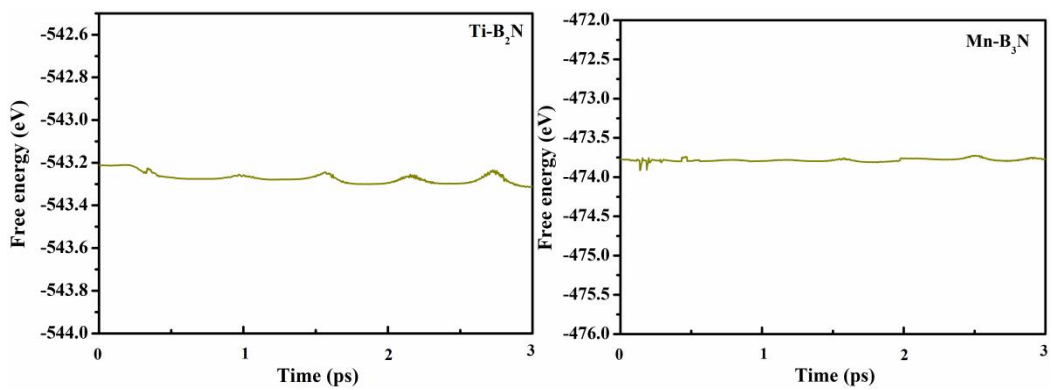

(a)

(b)

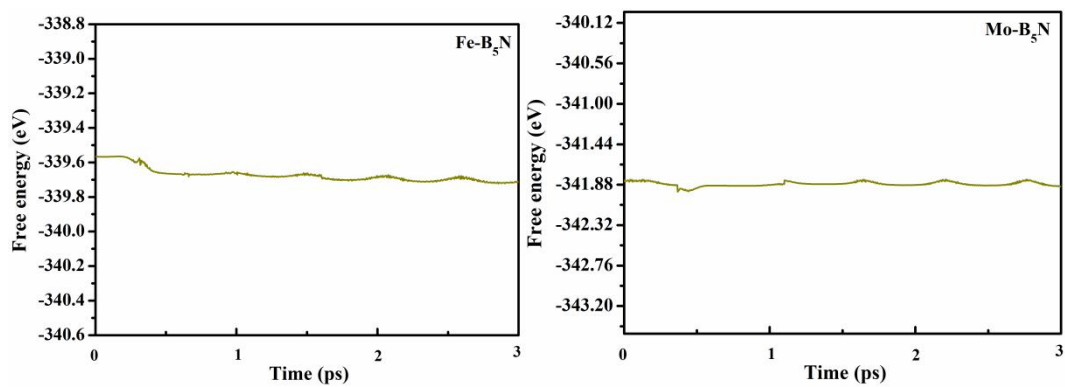

(c)

(d)

Fig. S4. The fluctuation of total energy in AIMD simulations for Ti@B<sub>2</sub>N, Mn@B<sub>3</sub>N, Fe@B<sub>5</sub>N and Mo@B<sub>5</sub>N monolayers at 300 K.

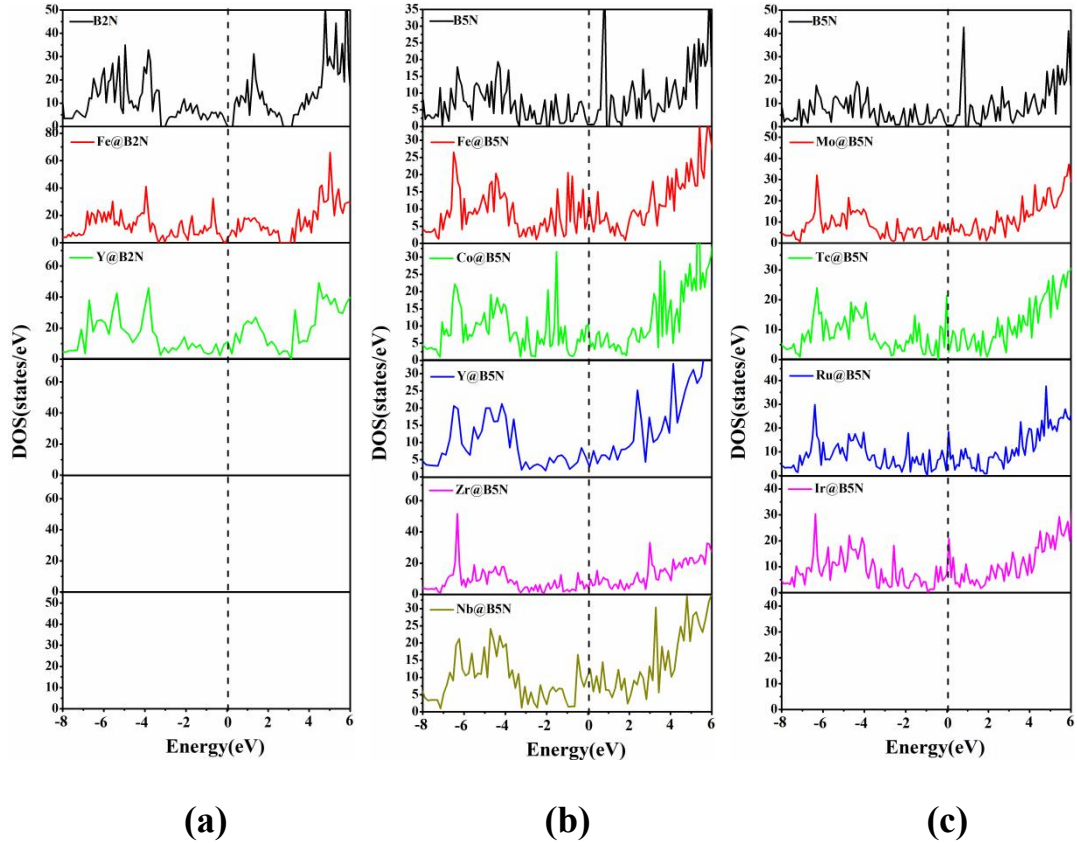

Fig. S5. The density of states (DOS) spectra for TM@B<sub>2</sub>N, TM@B<sub>3</sub>N and TM@B<sub>5</sub>N. The Fermi levels are set to zero and indicated black dashed lines.

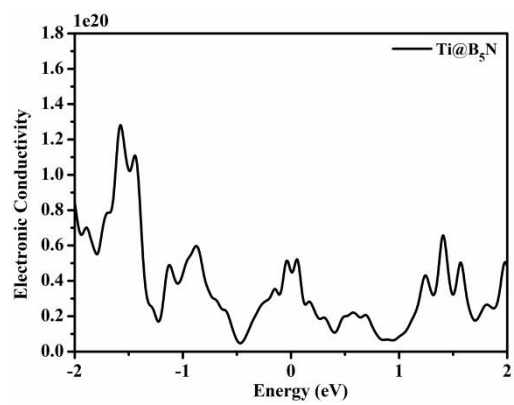

(a)

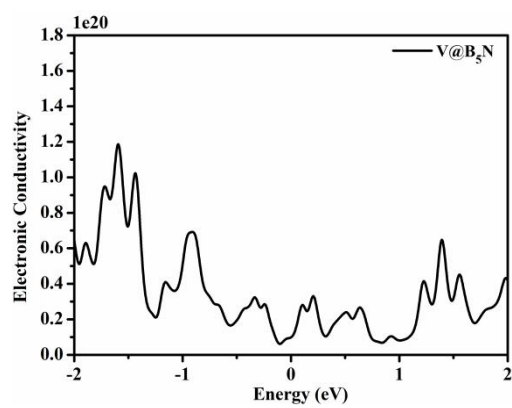

(b)

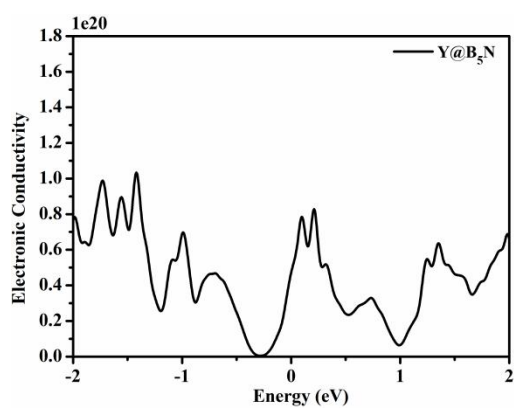

(c)

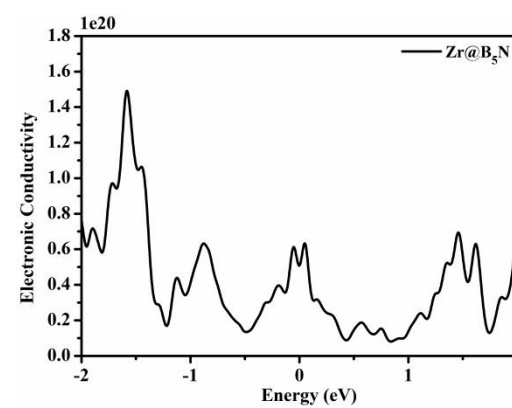

(d)

Fig. S6. The electronic conductivity variation of TM@B<sub>5</sub>N SACs.



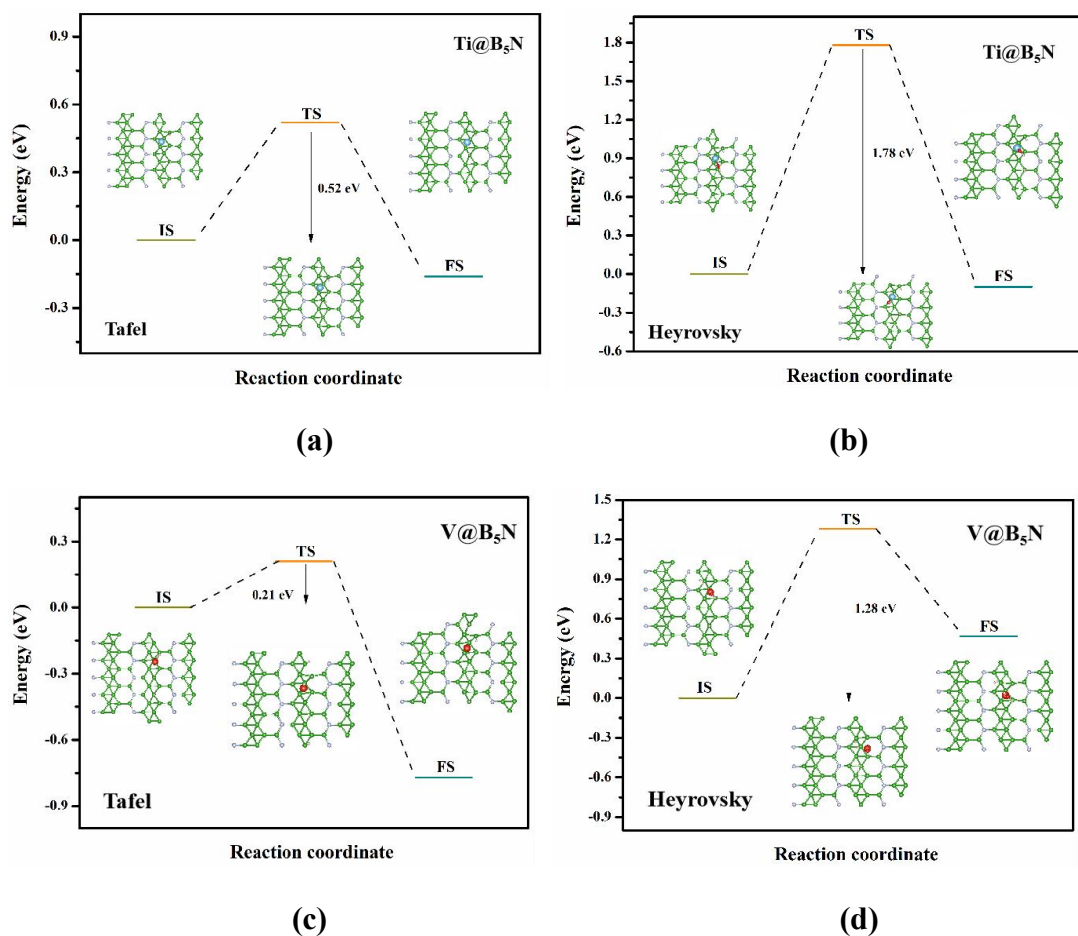

Fig. S7. Energy landscape of the Heyrovsky and the Tafel reactions on the (a-b) Ti@B<sub>5</sub>N and (c-d)V@B<sub>5</sub>N monolayers including the reaction coordinate structure of the initial state (IS), transition state (TS), and final state (FS).

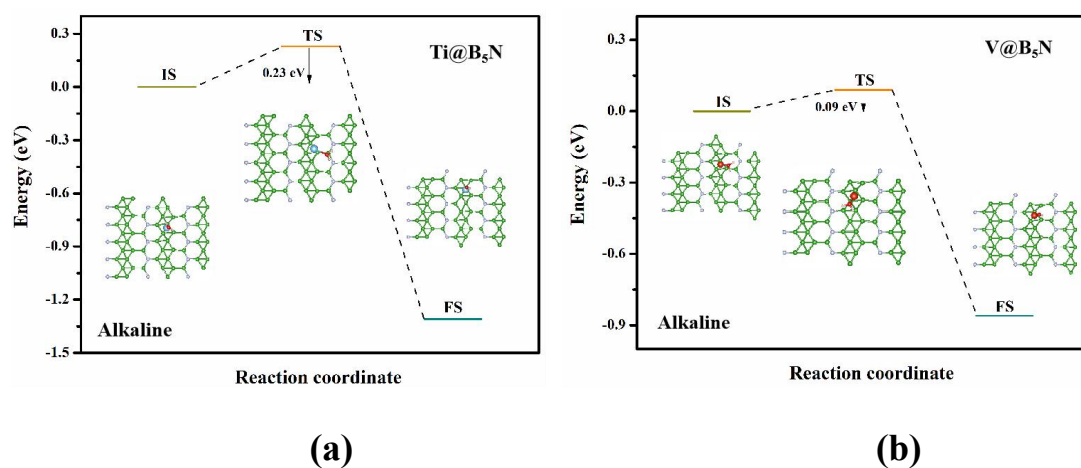

Fig. S8. Energy landscape of the water dissociation reaction on the Ti@B<sub>5</sub>N and V@B<sub>5</sub>N monolayers including the reaction coordinate structure of the initial state (IS), transition state (TS), and final state (FS).

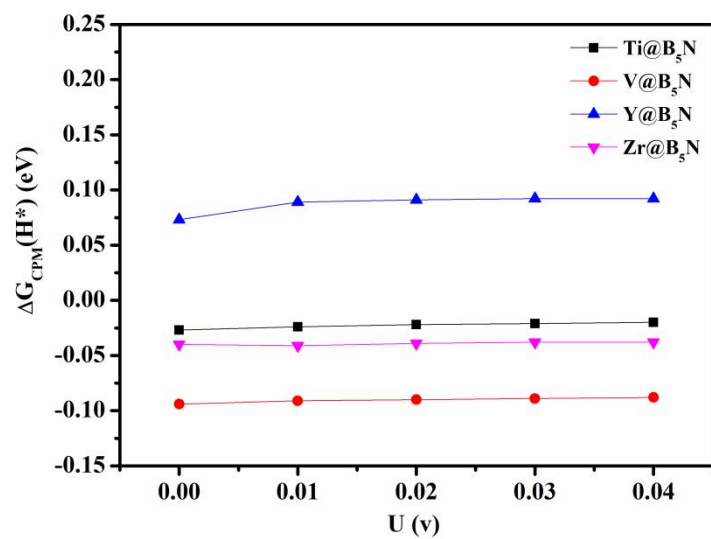

Fig. S9. Under the CPM model, the hydrogen adsorption free energy  $\Delta G(\text{H}^*)$  on TM@B<sub>5</sub>N SACs corresponding to different potentials.

Table S1. The different adsorption sites of TM atoms and the corresponding binding energy ( $E_b$ ). Taking Sc@B<sub>2</sub>N, Sc@B<sub>3</sub>N and Sc@B<sub>5</sub>N systems as examples.

| <b>System</b>       | <b>Adsorption site</b> | <b><math>E_b</math> (eV)</b> |
|---------------------|------------------------|------------------------------|
| Sc@B <sub>2</sub> N | B1 (Top site)          | -4.07                        |
|                     | B2 (Top site)          | -4.10                        |
|                     | B3 (Top site)          | -4.60                        |
|                     | N (Top site)           | -4.60                        |
|                     | H1 (Hollow site)       | -4.75                        |
| Sc@B <sub>3</sub> N | B1 (Top site)          | -3.15                        |
|                     | B2 (Top site)          | -3.81                        |
|                     | B3 (Top site)          | -3.81                        |
|                     | B4 (Top site)          | -3.75                        |
|                     | N (Top site)           | -3.81                        |
|                     | H1 (Hollow site)       | -3.59                        |
|                     | H2 (Hollow site)       | -3.91                        |
|                     | H3 (Hollow site)       | -3.75                        |
| Sc@B <sub>5</sub> N | B1 (Top site)          | -4.18                        |
|                     | B2 (Top site)          | -5.15                        |
|                     | B3 (Top site)          | -5.15                        |
|                     | B4 (Top site)          | -5.16                        |
|                     | N (Top site)           | -4.52                        |
|                     | H1 (Hollow site)       | -4.18                        |
|                     | H2 (Hollow site)       | -5.18                        |

## References

- [1] A. Valdes, Z.W. Qu, G.J. Kroes, J. Rossmeisl, J.K. Norskov, Oxidation and photooxidation of water on TiO<sub>2</sub> surface, *J. Phys. Chem. C*. 112 (2008) 9872–9879.
- [2] J.K. Nørskov, T. Bligaard, A. Logadottir, J.R. Kitchin, J.G. Chen, S. Pandalov, Trends in the Exchange Current for Hydrogen Evolution, *J. Electrochem. Soc.* 152 (2005) J23–J26.
- [3] J.K. Nørskov, T. Bligaard, J. Rossmeisl, C.H. Christensen, Towards the computational design of solid catalysts, *Nat. Chem.* 1 (2009) 37-46.
- [4] Y.A. Zhu, D. Chen, X.G. Zhou, W.K. Yuan, DFT studies of dry reforming of methane on Ni catalyst, *Catal. Today*. 148 (2009) 260–267.
- [5] J. Hu, S. Zheng, X. Zhao, X. Yao, Z. Chen, A theoretical study on the surface and interfacial properties of Ni<sub>3</sub>P for the hydrogen evolution reaction, *J. Mater. Chem. A*. 6 (17) (2018) 7827–7834.
- [6] G. García, M.T.M. Koper, Stripping voltammetry of carbon monoxide oxidation on stepped platinum single-crystal electrodes in alkaline solution, *Phys. Chem. Chem. Phys.* 10 (25) (2008) 3802.
- [7] S. Intikhab, J.D. Snyder, M.H. Tang, Adsorbed Hydroxide Does Not Participate in the Volmer Step of Alkaline Hydrogen Electrocatalysis, *ACS. Catal.* 7 (12) (2017) 8314–8319.
- [8] I. Ledezma-Yanez, W.D.Z. Wallace, P. Sebastian-Pascual, V. Climent, J.M. Feliu, M. T.M. Koper, Interfacial water reorganization as a pH-dependent descriptor of the hydrogen evolution rate on platinum electrodes, *Nat. Energy*. 2 (2017) 17031.
- [9] D.C. Tranca, F. Rodríguez-Hernández, G. Seifert, X. Zhuang, Theoretical models for hydrogen evolution reaction at combined Mo<sub>2</sub>C and N-doped graphene, *J. Catal.* 381 (2020) 234–247.
- [10] F. Banhart, J. Kotakoski, A.V. Krasheninnikov, Structural defects in graphene, *ACS. Nano*. 5 (2011) 26–41.
